# Supplementary material for: Mechanistic Assessment of Anise Seeds and Clove Buds against the Neurotoxicity Caused by Metronidazole in Rats: Possible Role of Antioxidants, Neurotransmitters, and Cytokines
Source: MDPI journal article supplement (doi:10.3390/toxics11090724), 2023-08-24
Supplement: s1 [file s1]

Sample Name: Anise characterization (Figure S1)

=====

Acq. Operator : SYSTEM Seq. Line : 16

Acq. Instrument : hplc -2 Location : Vial 13

Injection Date : 10/01/2021 06:49:56 µ Inj : 1

Inj Volume : 10.000 µl

Acq. Method : C:\CHEM32\1\DATA\POLYPHENOLS 10-1-2021 2021-01-10 13-10-37\POLYPHENOL 2017.M

Last changed : 10/01/2021 03:38:23 µ by SYSTEM

Analysis Method : C:\CHEM32\1\DATA\POLYPHENOLS 10-1-2021 2021-01-10 13-10-37\POLYPHENOL 2017.M (Sequence Method)

Last changed : 12/01/2021 03:33:38 µ by SYSTEM  
(modified after loading)

Additional Info : Peak(s) manually integrated

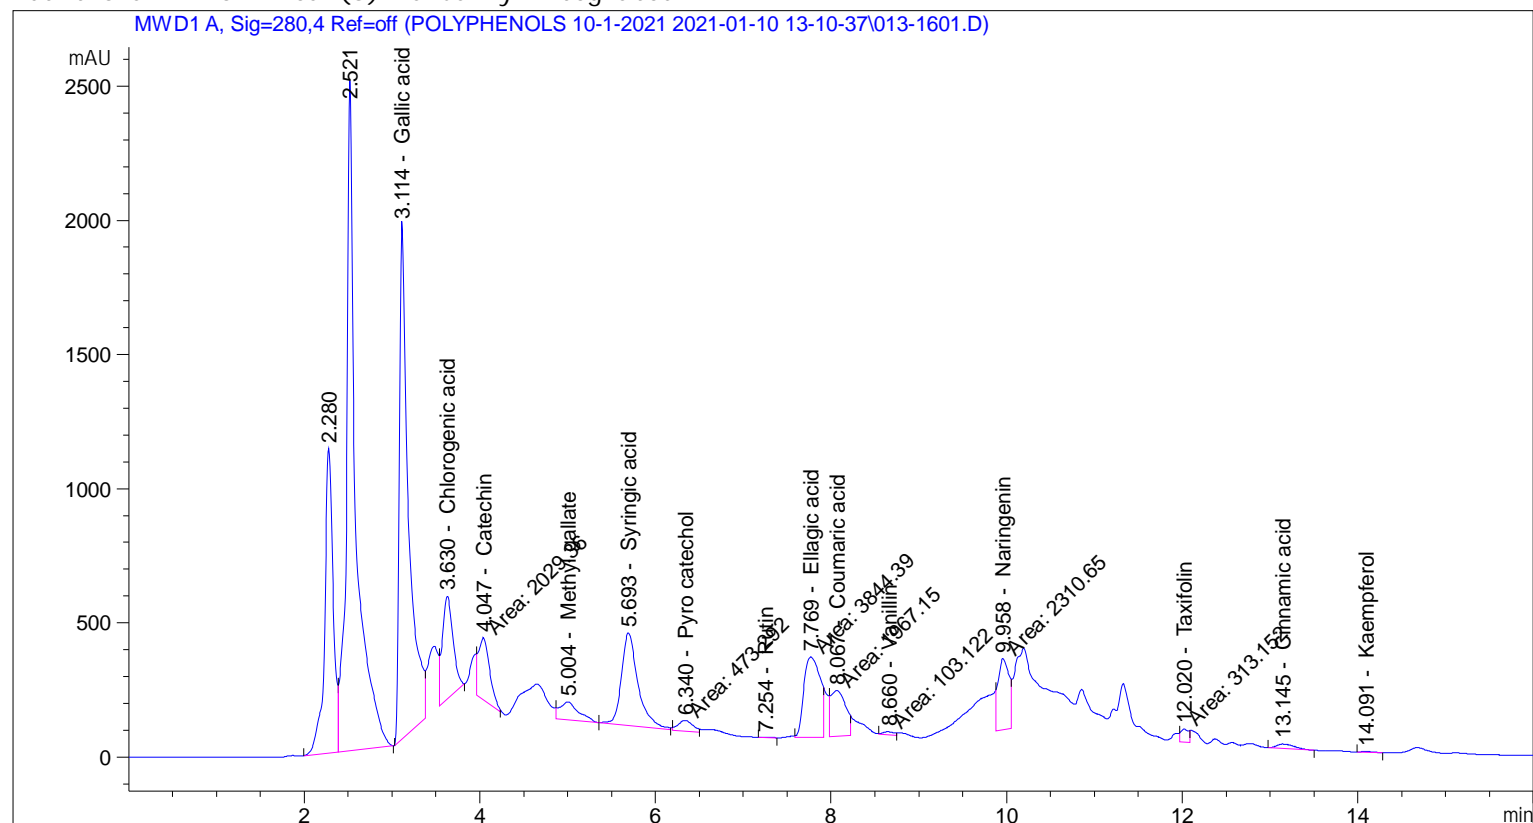

=====

Area Percent Report

=====

Sorted By : Signal

Calib. Data Modified : 12 January, 2021 03:33:38 µ

Multiplier : 1.0000

Dilution : 1.0000

Use Multiplier & Dilution Factor with ISTDs

Signal 1: MWD1 A, Sig=280,4 Ref=off

| Peak # | RetTime [min] | Type | Width [min] | Area [mAU*s] | Area %  | Name             |
|--------|---------------|------|-------------|--------------|---------|------------------|
| 1      | 2.280         | BV   | 0.1006      | 7638.87354   | 12.5413 | ?                |
| 2      | 2.521         | VB   | 0.1031      | 1.90750e4    | 31.3168 | ?                |
| 3      | 3.114         | BV   | 0.1035      | 1.41314e4    | 23.2005 | Gallic acid      |
| 4      | 3.630         | VB   | 0.1270      | 3252.87256   | 5.3405  | Chlorogenic acid |

Sample Name: Dr. Ragb 3

| Peak # | RetTime [min] | Type | Width [min] | Area [mAU*s] | Area % | Name             |
|--------|---------------|------|-------------|--------------|--------|------------------|
| 5      | 4.047         | MM   | 0.1464      | 2029.35522   | 3.3317 | Catechi n        |
| 6      | 5.004         | VB   | 0.2065      | 1014.84912   | 1.6662 | Methyl gallate   |
| 7      | 5.428         |      | 0.0000      | 0.00000      | 0.0000 | Coffei c aci d   |
| 8      | 5.693         | BV   | 0.1923      | 4503.74121   | 7.3941 | Syringi c aci d  |
| 9      | 6.340         | MM   | 0.1970      | 473.29214    | 0.7770 | Pyro catechol    |
| 10     | 7.254         | BB   | 0.1250      | 10.47772     | 0.0172 | Rutin            |
| 11     | 7.769         | MM   | 0.2140      | 3844.38647   | 6.3116 | Ellagi c aci d   |
| 12     | 8.067         | MM   | 0.1928      | 1967.14709   | 3.2296 | Coumari c aci d  |
| 13     | 8.660         | MM   | 0.1485      | 103.12163    | 0.1693 | Vani lli n       |
| 14     | 9.485         |      | 0.0000      | 0.00000      | 0.0000 | Ferul i c aci d  |
| 15     | 9.958         | MM   | 0.1450      | 2310.64795   | 3.7936 | Naringeni n      |
| 16     | 12.020        | MM   | 0.1094      | 313.15201    | 0.5141 | Taxi fol i n     |
| 17     | 13.145        | BB   | 0.2206      | 220.99344    | 0.3628 | Ci nnami c aci d |
| 18     | 14.091        | BB   | 0.1271      | 20.41864     | 0.0335 | Kaempferol       |

Totals : 6.09097e4

2 Warnings or Errors :

Warning : Calibration warnings (see calibration table listing)

Warning : Calibrated compound(s) not found

=====  
\*\*\* End of Report \*\*\*

Sample Name: **Clove characterization Figure S2**

```

=====
Acq. Operator   : SYSTEM                      Seq. Line :   17
Acq. Instrument : hplc -2                     Location  : Vial 14
Injection Date  : 10/01/2021 07:12:27 µ      Inj       :    1
                                           Inj Volume: 10.000 µl

Acq. Method     : C:\CHEM32\1\DATA\POLYPHENOLS 10-1-2021 2021-01-10 13-10-37\POLYPHENOL 2017.
                  M
Last changed    : 10/01/2021 03:38:23 µ by SYSTEM
Analysis Method : C:\CHEM32\1\DATA\POLYPHENOLS 10-1-2021 2021-01-10 13-10-37\POLYPHENOL 2017.
                  M (Sequence Method)
Last changed    : 12/01/2021 03:33:38 µ by SYSTEM
                  (modified after loading)
Additional Info : Peak(s) manually integrated
  
```

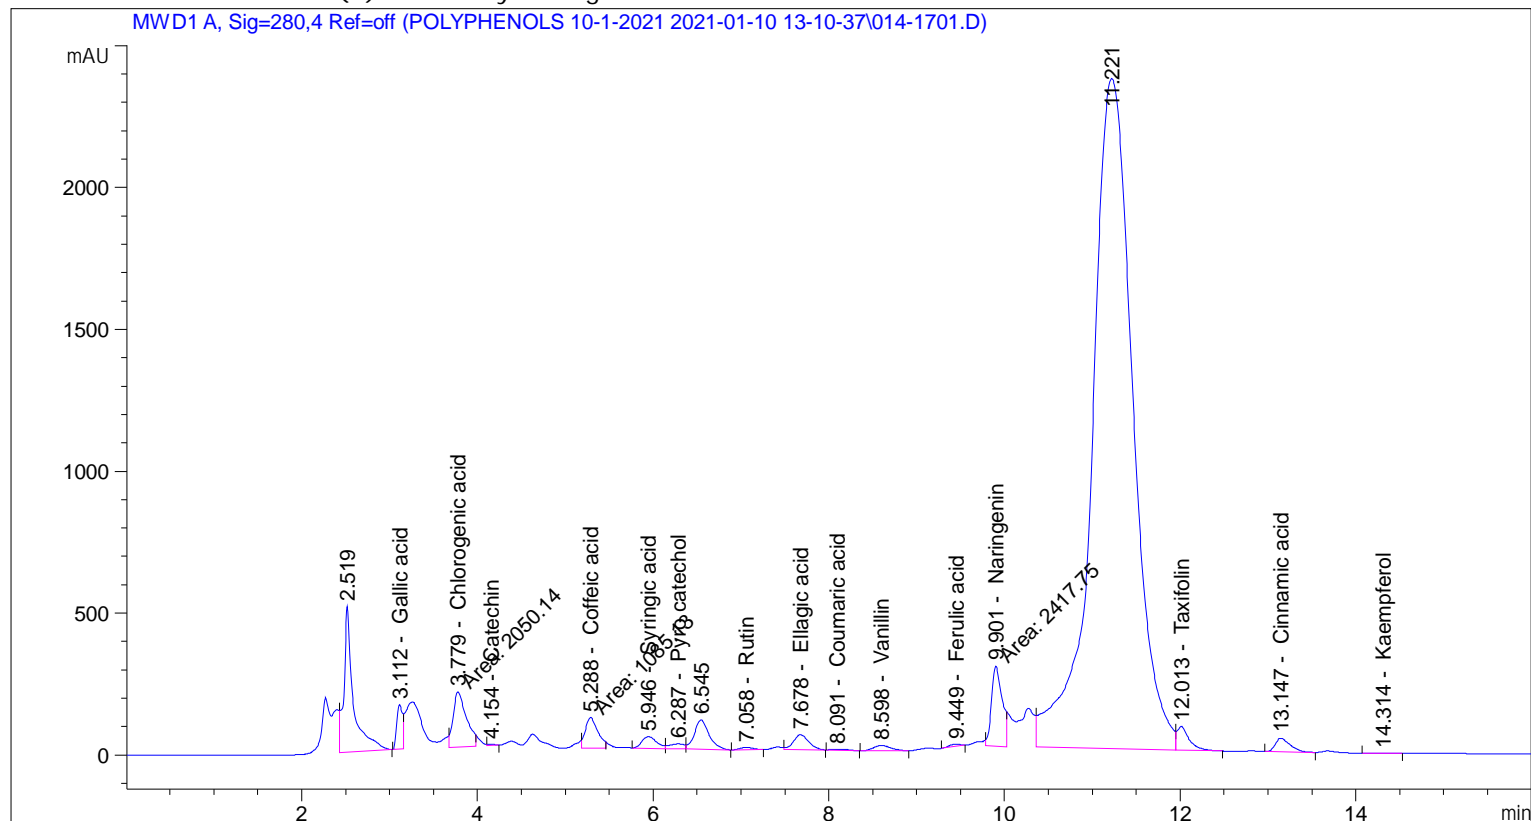

```

=====
                        Area Percent Report
=====
  
```

```

Sorted By      :      Signal
Calib. Data Modified :      12 January, 2021 03:33:38 µ
Multiplier     :      1.0000
Dilution       :      1.0000
Use Multiplier & Dilution Factor with ISTDs
  
```

Signal 1: MWD1 A, Sig=280,4 Ref=off

| Peak # | RetTime [min] | Type | Width [min] | Area [mAU*s] | Area % | Name             |
|--------|---------------|------|-------------|--------------|--------|------------------|
| 1      | 2.519         | VB   | 0.0993      | 3833.98291   | 4.2273 | ?                |
| 2      | 3.112         | BV   | 0.0696      | 721.25635    | 0.7953 | Gallic acid      |
| 3      | 3.779         | MM   | 0.1750      | 2050.14233   | 2.2605 | Chlorogenic acid |
| 4      | 4.154         | VB   | 0.0834      | 28.44088     | 0.0314 | Catechin         |

| Peak # | RetTime [min] | Type | Width [min] | Area [mAU*s] | Area %  | Name           |
|--------|---------------|------|-------------|--------------|---------|----------------|
| 5      | 5.037         |      | 0.0000      | 0.00000      | 0.0000  | Methyl gallate |
| 6      | 5.288         | MM   | 0.1670      | 1085.13452   | 1.1965  | Coffeic acid   |
| 7      | 5.946         | BV   | 0.1788      | 475.21027    | 0.5240  | Syringic acid  |
| 8      | 6.287         | VV   | 0.1740      | 202.00060    | 0.2227  | Pyro catechol  |
| 9      | 6.545         | VB   | 0.1744      | 1213.27148   | 1.3377  | ?              |
| 10     | 7.058         | BB   | 0.1623      | 89.68539     | 0.0989  | Rutin          |
| 11     | 7.678         | VB   | 0.1843      | 645.96545    | 0.7122  | Ellagic acid   |
| 12     | 8.091         | BB   | 0.2345      | 48.63359     | 0.0536  | Coumaric acid  |
| 13     | 8.598         | BB   | 0.2069      | 259.16736    | 0.2858  | Vanillin       |
| 14     | 9.449         | BB   | 0.1481      | 66.08925     | 0.0729  | Ferulic acid   |
| 15     | 9.901         | MM   | 0.1427      | 2417.74707   | 2.6658  | Naringenin     |
| 16     | 11.221        | VV   | 0.4965      | 7.61792e4    | 83.9945 | ?              |
| 17     | 12.013        | VB   | 0.1355      | 800.26587    | 0.8824  | Taxifolin      |
| 18     | 13.147        | VV   | 0.1756      | 570.16901    | 0.6287  | Cinnamic acid  |
| 19     | 14.314        | BB   | 0.2090      | 9.14474      | 0.0101  | Kaempferol     |

Totals : 9.06955e4

2 Warnings or Errors :

Warning : Calibration warnings (see calibration table listing)

Warning : Calibrated compound(s) not found

\*\*\* End of Report \*\*\*

Table S1. Primers for gene expression by RT-PCR

| Gene  | Direction | Primer sequence        | Accession<br>number |
|-------|-----------|------------------------|---------------------|
| CAT   | Sense     | TAAGACTGACCAGGGCA      | NM_012520.2         |
|       | Antisense | CAAACCTTGGTGAGATCGAA   |                     |
| CASP3 | Sense     | CTGGACTGCGGTATTGAGAC   | NM_012922.2         |
|       | Antisense | CCGGGTGCGGTAGAGTAAGC   |                     |
| Bax   | Sense     | GGCGAATTGGCGATGAACTG   | NM_017059.2         |
|       | Antisense | ATGGTTCTGATCAGCTCGGG   |                     |
| Bcl-2 | Sense     | GATTGTGGCCTTCTTTGAGT   | NM_016993.1         |
|       | Antisense | ATAGTTCCACAAAGGCATCC   |                     |
| SOD   | Sense     | AGGATTAAGTGAAGGCGAGCAT | NM_017050.1         |
|       | Antisense | TCTACAGTTAGCAGGCCAGCAG |                     |
| Nrf2  | Sense     | TGTCAGCTACTCCCAGGTTG   | NM_031789.2         |
|       | Antisense | ATCAGGGGTGGTGAAGACTG   |                     |
| GAPDH | Sense     | TCAAGAAGGTGGTGAAGCAG   | NM_017008.4         |
|       | Antisense | AGGTGGAAGAATGGGAGTTG   |                     |

Bax, Bcl-2-associated X protein. Bcl-2, B-cell lymphoma 2. CASP3, caspase 3. CAT, catalase.

GAPDH, glyceraldehyde-3-phosphate dehydrogenase. SOD, superoxide dismutase. (Nrf2)

Nuclear factor (erythroid-derived 2)-like 2.
